# Supplementary material
Source: publisher site journal article supplement (https://www.kjim.org/upload/media/kjim-2024-399-Supplementary-Fig-1.pdf)
Supplement: Supplementary file 1 [file kjim-2024-399-Supplementary-Fig-1.pdf]

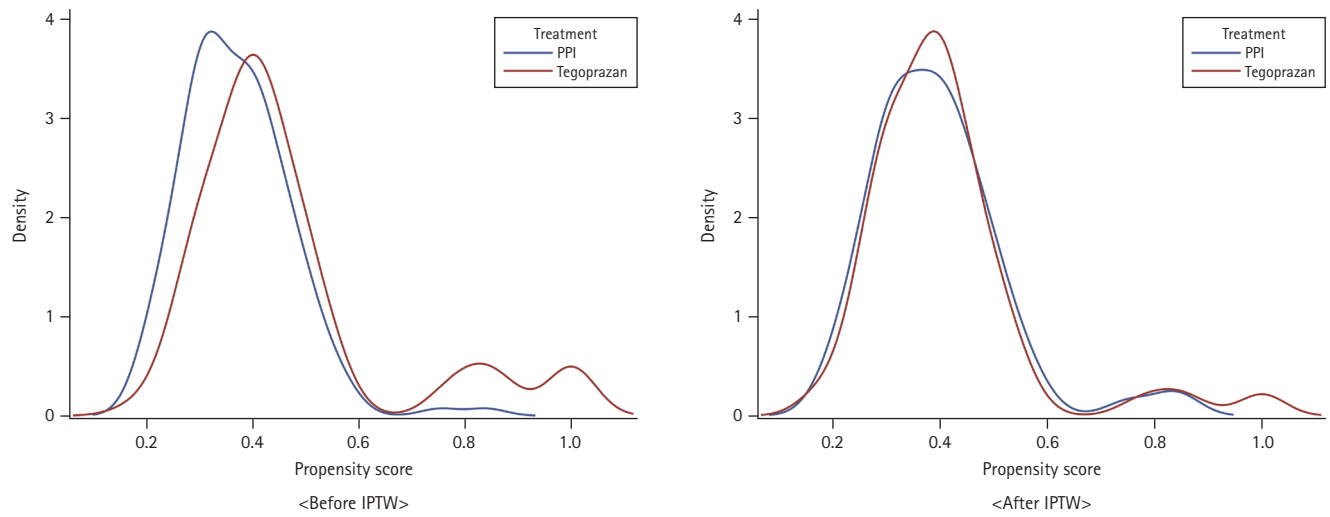

**Supplementary Figure 1.** Propensity score distribution. PPI, proton-pump inhibitor; IPTW, inverse probability of treatment weighting.
